# Supplementary material for: An Early Disturbance in Serotonergic Neurotransmission Contributes to the Onset of Parkinsonian Phenotypes in Drosophila melanogaster
Source: MDPI journal article supplement (doi:10.3390/cells11091544), 2022-05-05
Supplement: s1 [file s1]

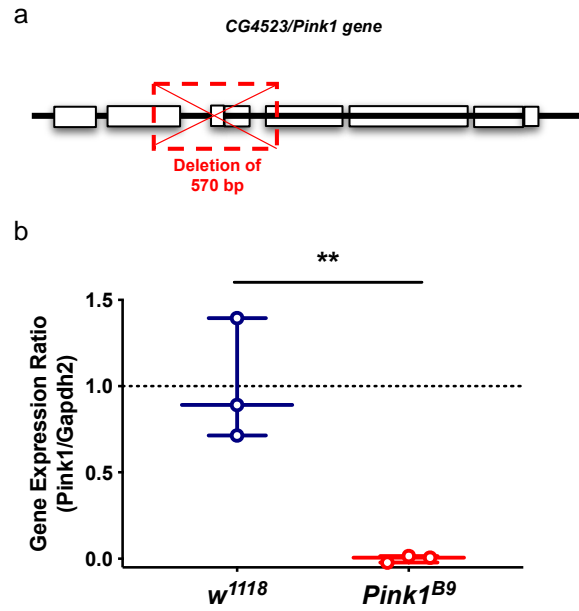

**Figure S1.** *Pink1*<sup>B9</sup> mutant fly. A schematic representation of the *Drosophila Pink1* gene: exons are indicated in boxes, and coding regions are colored black (a). The rectangle with dashed red line indicates the deleted region in the mutant. Quantification of RT-qPCR represented as Gene Expression Ratio of *Pink1* transcripts normalized to *Gapdh2* transcript levels (b). Data shown represents interquartile range with maximum and minimum range from  $n = 3$  independent RT-qPCR experiments, \*\* indicates  $p < 0.01$ ; Student's t-test. Dashed black line refers to the mean of control fly.

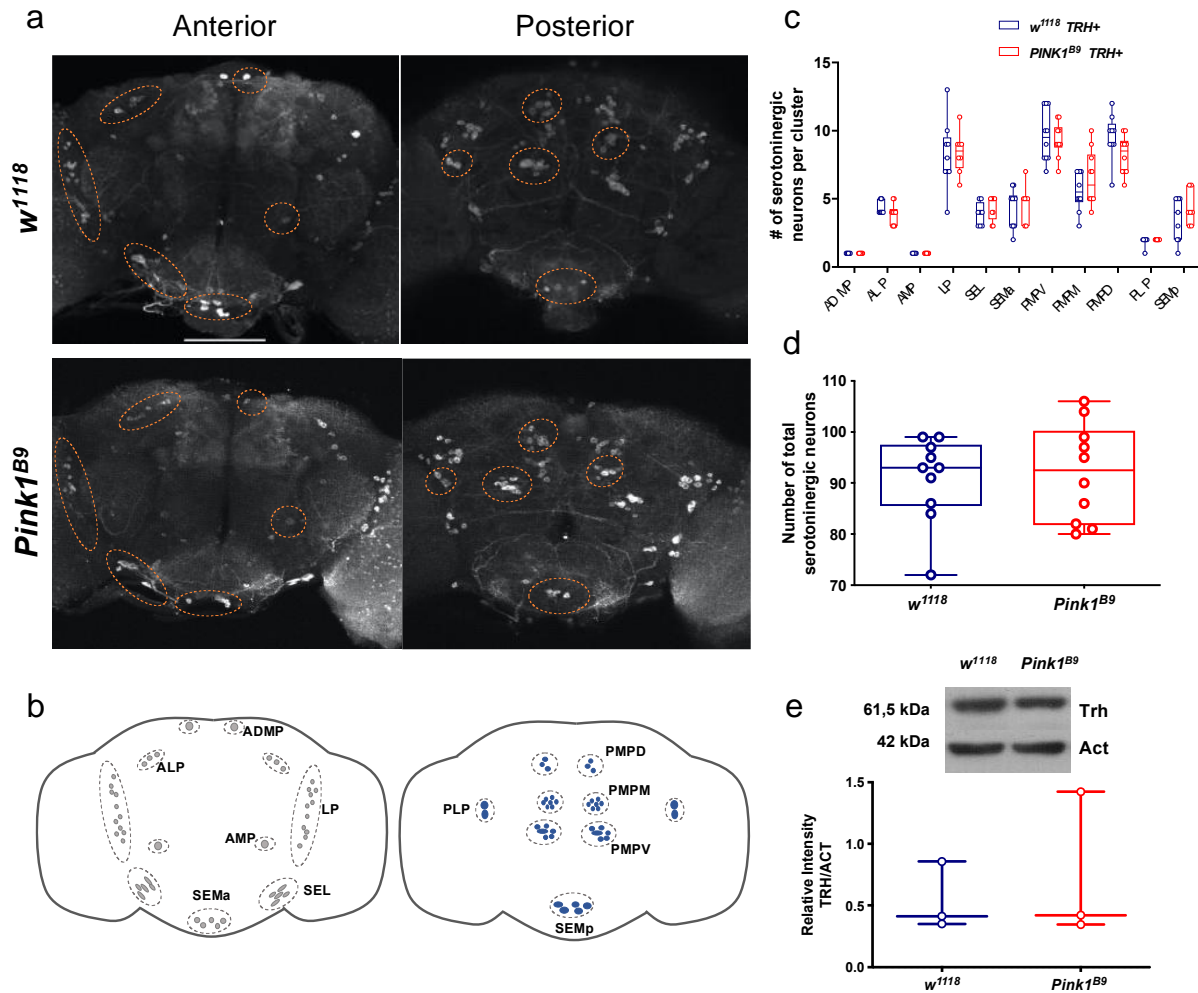

**Figure S2.** No changes in number of serotonergic neurons and TRH protein levels are associated with reduced 5-HT content in *Pink1<sup>B9</sup>* mutant flies. Representative images of Trh+ neurons in control and *Pink1<sup>B9</sup>* flies, anterior (left) and posterior (right) halves of the fly brain (**a**). The serotonergic clusters are identified in orange circles delimited with dashed lines. Schemes of the serotonergic clusters described in the literature (**b**). Quantification of the number (#) of serotonergic neurons per cluster and per hemisphere in 14-days old control (blue boxes) and *Pink1<sup>B9</sup>* mutant (red boxes) flies (**c**). Quantification of the total number of Trh positive serotonergic neurons in 14-days old flies (**d**). Data in **c** and **d** are presented as interquartile range with maximum and minimum range of 10 left brain hemispheres per genotype; two-way ANOVA followed by Bonferroni's post-test indicate no significant differences in **c**; and student's t-test indicates no statistical differences between genotypes in **d**. Western blot for Trh protein in 14-17 days old *Pink1<sup>B9</sup>* and *w<sup>1118</sup>* control flies (**e**). As a loading control, blots for Actin (Act) are also shown. Upper panel presents a representative experiment with results for Trh (upper bands) and Act (lower bands). Lower panel shows

quantification (expressed as relative intensity) of Trh and Act bands from 3 independent experiments, each one consisting of 60 head flies. Data are presented interquartile range with maximum and minimum range. The Student's *t*-test indicates no statistical differences between mutant and control groups.

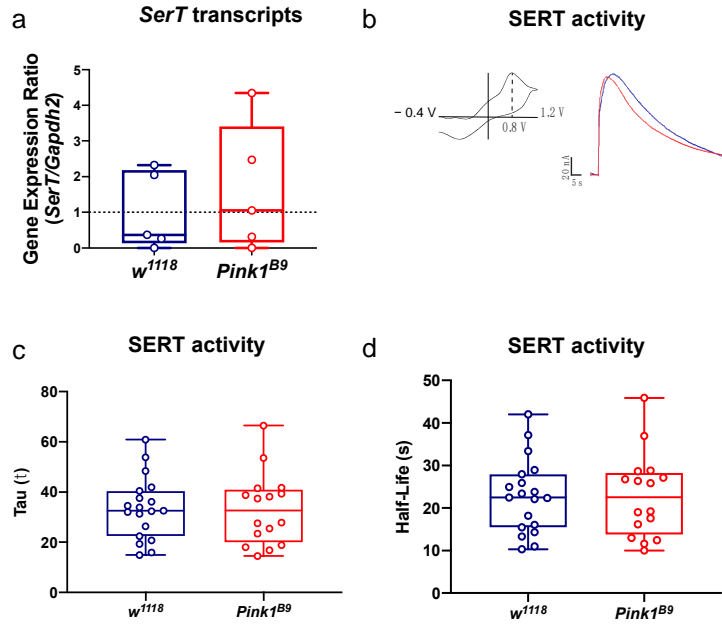

**Figure S3.** SerT activity in 0-3 days old flies. *SerT* transcript levels were evaluated in 3- days old *w<sup>1118</sup>* control and *Pink1<sup>B9</sup>* mutant flies by RT-qPCR. Quantification is presented as the Gene Expression Ratio of *SerT* transcripts normalized to *Gapdh2* transcripts (a). Data are presented as interquartile range with maximum and minimum range. Dashed black line refers to the mean of control fly. Student's *t*-test indicates no statistical differences between groups. SerT activity in *Pink1<sup>B9</sup>* mutant and *w<sup>1118</sup>* control animals evaluated by FSCV, in brains from 3-days old flies (b–d). In left panel of b, it is shown a typical voltammogram for 5-HT, while representative experiments showing 5-HT signals recorded in brains of *w<sup>1118</sup>* control (blue line) and *Pink1<sup>B9</sup>* mutant flies (red line) are shown in right panel. *tau*, a kinetic parameter obtained from 5-HT signals recorded in fly brains from *w<sup>1118</sup>* control and *Pink1<sup>B9</sup>* (c). Half-life in (s), a kinetic parameter obtained from 5-HT signals recorded in fly brains from each genotype (d). Data in c and d are presented as interquartile range with maximum and minimum range of 5 brains per genotype. Student's *t*-test indicates no statistical differences between groups.

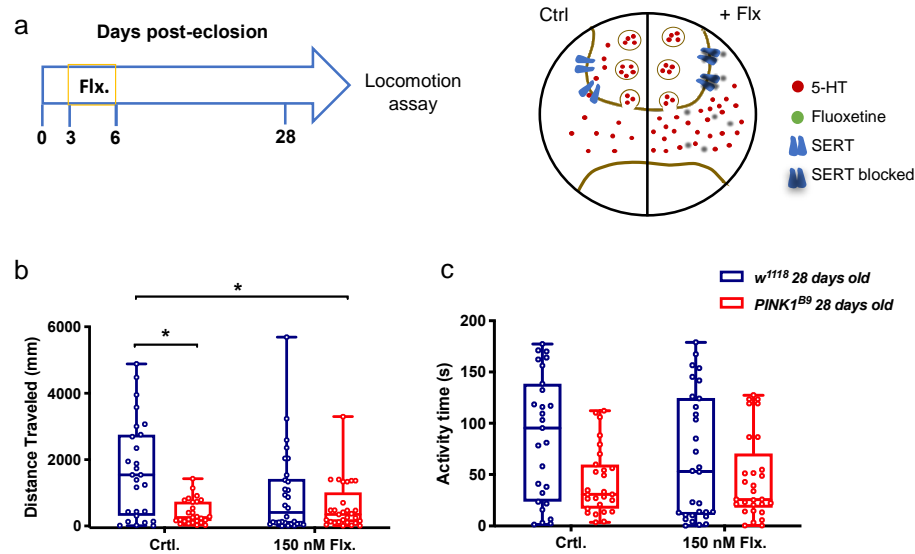

**Figure S4.** Effect of 150 nM fluoxetine on the locomotor behavior in 28-days old *Pink1<sup>B9</sup>* mutant and control flies. **(a).** Left panel, a scheme for the timing of the fluoxetine (150 nM) treatment. Right panel, a schematic representation of the pharmacological effect of fluoxetine treatment (right, +Flx) as compared to the control situation (left, Ctrl). **(b,c)** Distance traveled (mm) and activity time (s), two locomotor parameters recorded in 28-days old control and *Pink1<sup>B9</sup>* mutant flies treated or not with fluoxetine (150 nM Flx and Ctrl, respectively). Data was obtained from  $n = 27$  ( $w^{1118}$ ); 30 ( $w^{1118} + \text{Flx}$ ); 27 (*Pink1<sup>B9</sup>*); 29 (*Pink1<sup>B9</sup>* + Flx) flies. Data are presented as interquartile range with maximum and minimum range. \* indicates  $p < 0.05$ ; Scheirer-Ray-Hare test followed by Dunn's post-test.

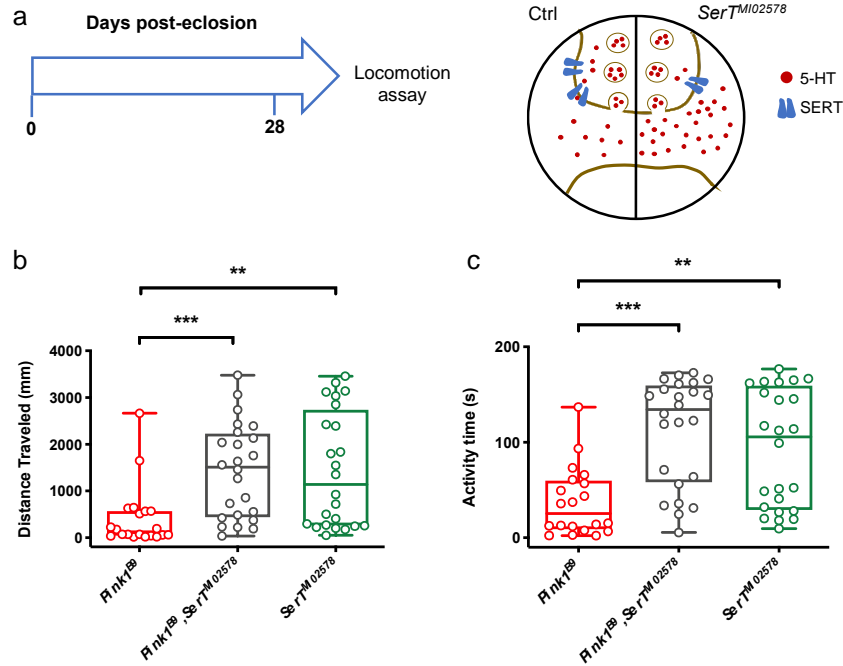

**Figure S5.** Effect of the genetic increase of serotonergic signaling on locomotor behavior in 28-day-old *Pink1<sup>B9</sup>* mutant flies. (a). Left panel, a scheme for the timing of the genetic experiment during the adult stage. Right panel, a schematic representation of the serotonergic terminal exhibiting the increased serotonergic signaling as result of SerT decrease. (b,c) Distance traveled (mm) and activity time (s), two locomotor parameters recorded in 28-day-old *Pink1<sup>B9</sup>,SerT<sup>M102578</sup>* double mutant flies and their respective control flies. Data was obtained from  $n = 20$  (*Pink1<sup>B9</sup>*); 24 (*Pink1<sup>B9</sup>,SerT<sup>M102578</sup>*); 25 (*Pink1<sup>B9</sup>*); 29 (*SerT<sup>M102578</sup>*) flies. Data are presented as interquartile range with maximum and minimum range. \*\* and \*\*\* indicate  $p < 0.01$  and  $p < 0.001$ , respectively; Kruskal-Wallis test followed by Dunn's post hoc test.
